# Supplementary material for: Tailoring natural anthracite carbon materials towards considerable electrochemical properties with exploration of ester/ether-based electrolyte
Source: Royal Society of Chemistry journal article supplement (doi:10.1039/d2ta09704d), 2023-01-01
Supplement: d2ta09704d1.pdf [file d2ta09704d1.pdf]

## **Tailoring natural anthracite carbon materials towards considerable electrochemical properties with the exploring of ester/ether-based electrolyte**

Yu Dong,<sup>a</sup> Shaohui Yuan,<sup>a</sup> Wenqing Zhao,<sup>a</sup> Chenxing Yi,<sup>a</sup> Zihao Zeng,<sup>a</sup> Siyan Xie,<sup>a</sup> Yue Yang,<sup>a</sup> Wei Sun,<sup>a</sup> Xiaobo Ji<sup>b,c</sup> and Peng Ge<sup>\*a</sup>

<sup>a</sup> School of Minerals Processing and Bioengineering, Central South University, Changsha 410083, China.

<sup>b</sup> College of Chemistry and Chemical Engineering, Central South University, Changsha 410083, China.

<sup>c</sup> State Key Laboratory of Powder Metallurgy, Central South University, Changsha 410083, China.

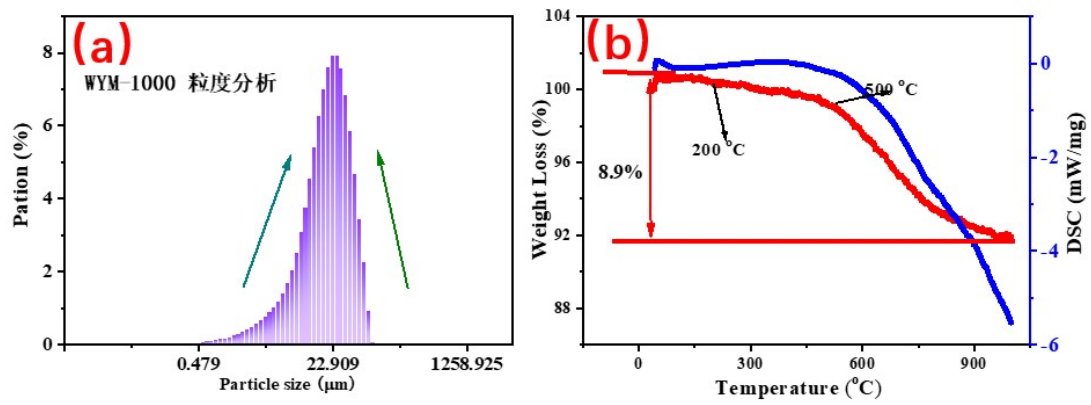

Fig.S1 For WYM-1000 samples, the particle size distribution, and TG curves

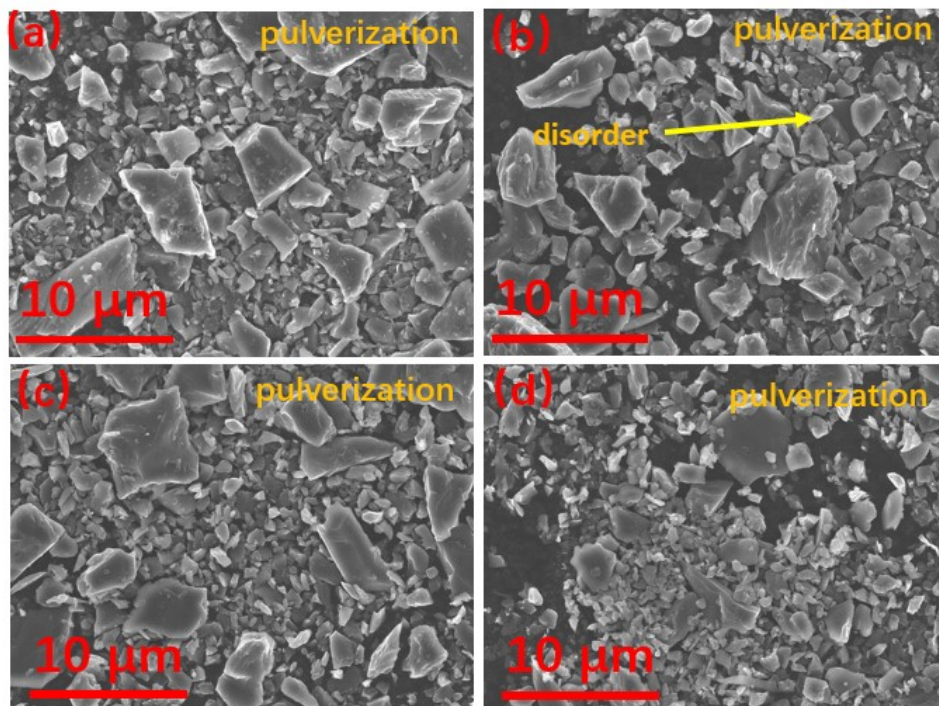

Fig.S2 SEM images about WYM-800 (a), WYM-1000 (b), WYM-1200 (c), WYM-1400 (d)
